# Supplementary material for: Cell volume homeostatically controls the rDNA repeat copy number and rRNA synthesis rate in yeast
Source: PubMed Central journal article supplement (PMC8055003; doi:10.1371/journal.pgen.1009520), 2021-04-07

# Supplementary Figure 1

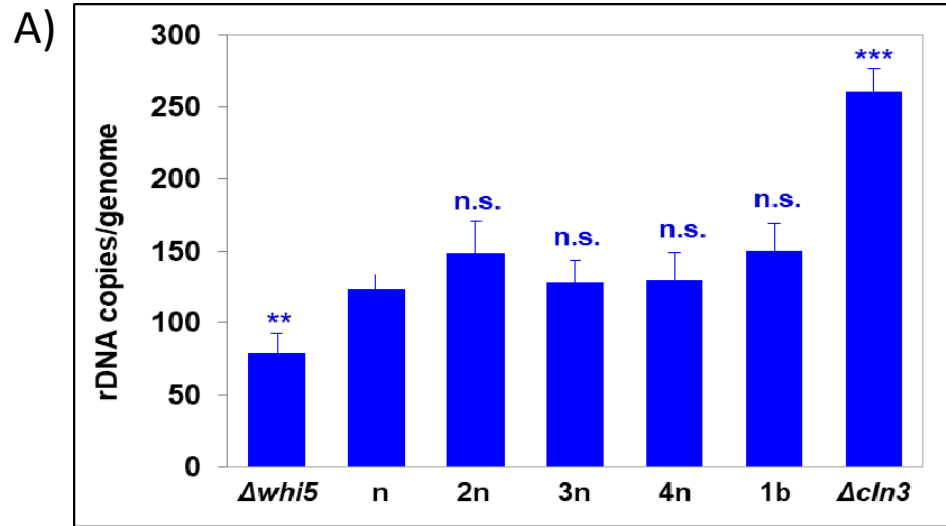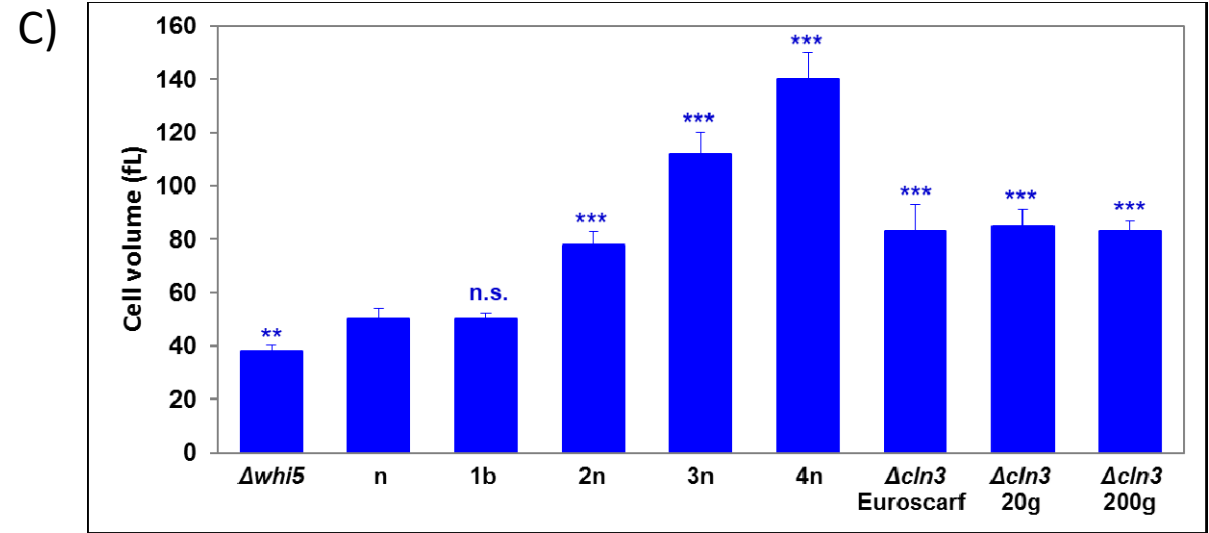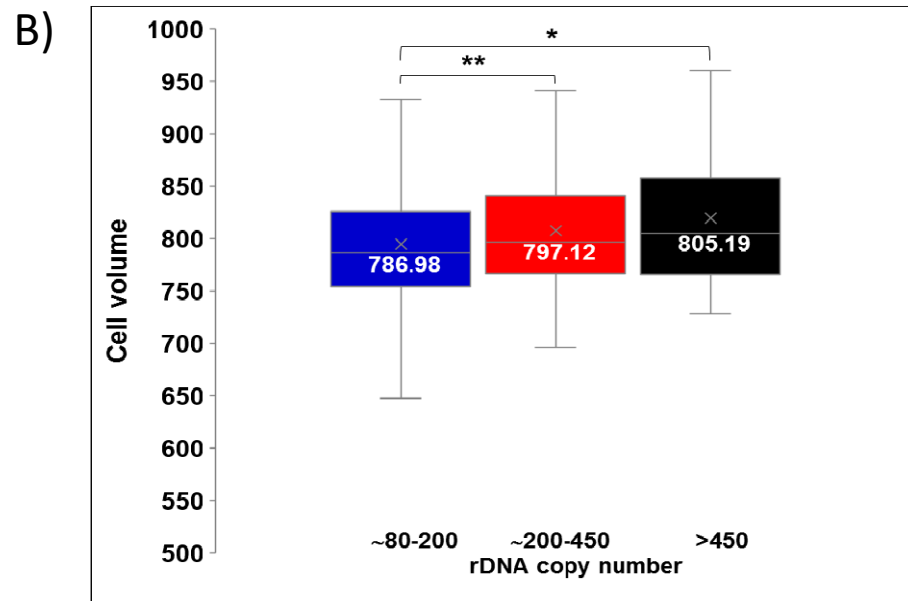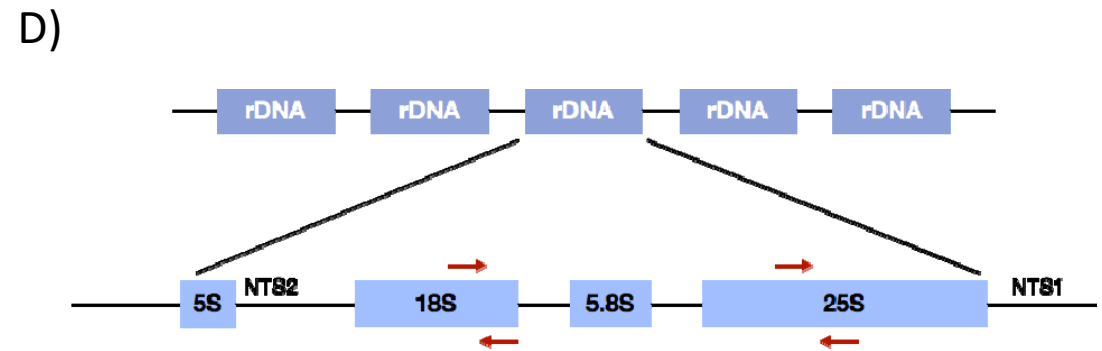

Supplement: pgen.1009520.s001.pdf [file pgen.1009520.s001.pdf]
