# Supplementary material for: Cell volume homeostatically controls the rDNA repeat copy number and rRNA synthesis rate in yeast
Source: PubMed Central journal article supplement (PMC8055003; doi:10.1371/journal.pgen.1009520), 2021-04-07
Supplement: pgen.1009520.s003.pdf [file pgen.1009520.s003.pdf]

| Strain                                  | Genotype                                                                                                                                                         | Source       | Ploidy | Doubling time (h) | Volume (fL) | Relative Volume |
|-----------------------------------------|------------------------------------------------------------------------------------------------------------------------------------------------------------------|--------------|--------|-------------------|-------------|-----------------|
| <b>BY4741 (n)</b>                       | <i>MAT a, leu2Δ0, his3Δ1, met15Δ0, ura3Δ0</i>                                                                                                                    | Euroscarf    | n      | 1.7               | 50 ± 4      | 1               |
| <b>PY4993 (2n)</b>                      | <i>MAT a/α; ura3Δ0/ura3Δ0, leu2Δ0/leu2Δ0, his3Δ1/his3Δ1, met15Δ0/MET15, LYS2/lys2Δ0</i>                                                                          | Pellman Lab  | 2n     | 1.7               | 78 ± 5      | 1.57            |
| <b>PY4997 (3n)</b>                      | <i>MAT a/a/α; ura3Δ0/ura3Δ0/ura3Δ0, leu2Δ0/leu2Δ0/leu2Δ0, his3Δ1/his3Δ1/his3Δ1, met15Δ0/MET15/MET15/, lys2Δ0/lys2Δ0/LYS2</i>                                     | Pellman Lab  | 3n     | 1.7               | 112 ± 8     | 2.26            |
| <b>PY4996 (4n)</b>                      | <i>MAT a/a/α/α;;ura3Δ0/ura3Δ0/ura3Δ0/ura3Δ0, leu2Δ0/leu2Δ0/leu2Δ0/leu2Δ0, his3Δ1/his3Δ1/his3Δ1/his3Δ1, met15Δ0/met15Δ0/MET15/MET15/, lys2Δ0/lys2Δ0/LYS2/LYS2</i> | Pellman Lab  | 4n     | 1.7               | 140 ± 10    | 2.83            |
| <b>JCY0704</b>                          | BY4741 <i>whi5::LEU2</i>                                                                                                                                         | JC Igual Lab | n      | 1.9               | 38 ± 3      | 0.76            |
| <b>BQS2006 (Euroscarf <i>cln3Δ</i>)</b> | Haploid strain derived from Y30366 diploid (Euroscarf). <i>MAT?</i> ; <i>ura3Δ, leu2Δ, HIS3, MET15, lys2Δ, cln3::KanMX4</i>                                      | our lab      | n      | 1.9               | 83 ± 10     | 1.68            |
| <b>BQS278</b>                           | BY4741 <i>sir2::KanMX4</i>                                                                                                                                       | our lab      | n      | nd                | nd          | nd              |
| <b>NOY408-1b</b>                        | <i>MAT a ade2-1 ura3-1 his3-11 trp1-1 leu2-3, 112 can1-100 pNOY102</i>                                                                                           | Kobayasi Lab | n      | 2                 | 43.7 ± 9    | 1.02*           |

\*Relative volume values were obtained by considering BY4741 volume when growing in YPGal. Rest of volumes obtained from growth in YPD exponential phase. n.d. not determined

## Supplementary Table 1
