# Supplementary material for: Cell volume homeostatically controls the rDNA repeat copy number and rRNA synthesis rate in yeast
Source: PubMed Central journal article supplement (PMC8055003; doi:10.1371/journal.pgen.1009520), 2021-04-07
Supplement: pgen.1009520.s004.pdf [file pgen.1009520.s004.pdf]

### Oligonucleotides used in this study

| Name                                 | 5'-3' Sequence                                                        |
|--------------------------------------|-----------------------------------------------------------------------|
| <b>RT-qPCR assays</b>                |                                                                       |
| ACT1-Forward                         | TCGTTCCAATTTACGCTGGTT                                                 |
| ACT1-Reverse                         | CGGCCAAATCGATTCTCAA                                                   |
| SIR2-Forward                         | ATTTATGCACGACCCCTCTG                                                  |
| SIR2-Reverse                         | TGGCACTGCACCAGTTTATC                                                  |
| UAF30-Forward                        | GAATTGACGAGGACCGAAGTAG                                                |
| UAF30-Reverse                        | CGTCGCACAGTATTTCTTTCTTG                                               |
| 5.8S-Forward                         | GTTGCGGCCATATCTACCAG                                                  |
| 5.8S-Reverse                         | AGCACCTGAGTTTCGCGTAT                                                  |
| 18S-Forward                          | CATGGCCGTTCTTAGTTGGT                                                  |
| 18S-Reverse                          | ATTGCCTCAAACCTCCATCG                                                  |
| 25S-Forward                          | AGAGCCAATCCTTATCCCG                                                   |
| 25S-Reverse                          | GGAAGCTCCGTTTCAAAGG                                                   |
| <b>Gene disruption</b>               |                                                                       |
| CLN3_KAN-Forward                     | CTTTTACTCTCGTTCAAGACACTGATTTGATACGCTTTCTGTACGC<br>GTACGCTGCAGGTCGAC   |
| CLN3_KAN-Reverse                     | AAATTTTAATTTATTTGTTGTTAAATGCATTTTTTTTTTTGTCGTTATC<br>GATGAATTCGAGCTCG |
| <b>Generation of Southern probes</b> |                                                                       |
| ACT1-Forward                         | GTATTTTCACGCCGATAGATG                                                 |
| ACT1-Reverse                         | TTGGTCTACCGACGATAGATG                                                 |
| 18S-Forward                          | CGAATTCCAGCTGACCACCATGTCAATGTCTTCGGA                                  |
| 18S-Reverse                          | AGGACTCAAGGTTAGCC                                                     |
