# Supplementary material for: Cell volume homeostatically controls the rDNA repeat copy number and rRNA synthesis rate in yeast
Source: PubMed Central journal article supplement (PMC8055003; doi:10.1371/journal.pgen.1009520), 2021-04-07
Supplement: pgen.1009520.s005.pdf [file pgen.1009520.s005.pdf]

## Appendix: Integral Feedback

1

Consider the following system of chemical reactions which correspond to UAF molecules binding/unbinding to rDNA

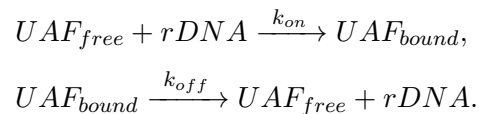

We assume that the total number of UAF molecules inside the cell scales with volume, and is given by  $cV$ , where  $V$  is the cell volume, and  $c$  is the UAF concentration. Then the number of bound UAF molecules bound to rDNA is given by

$$\frac{ck_{on}mV}{k_{off}V + k_{on}m + k_{on}cV} \quad (1)$$

where  $m$  is the number of rDNA repeats. In the limit of strong binding of UAF to rDNA ( $k_{off} \ll k_{on}c$ ), the concentration of free UAF molecules

$$\frac{c^2}{m/V + c} \quad (2)$$

increases with increasing  $V$ . We assume that the production of SIR2 is a monotonically decreasing function of  $\frac{c^2}{m/V+c}$  and given by  $f\left(\frac{c^2}{m/V+c}\right)$ . Let  $x(t)$  denote the level of SIR2, then it evolves as per the differential equation

$$\frac{dx}{dt} = f\left(\frac{c^2}{m/V + c}\right) - \gamma_x x \quad (3)$$

where  $\gamma_x$  is the SIR2 degradation rate and time  $t$  can be interpreted in terms of number of generations. The number of rDNA repeats  $m(t)$  follows the

differential equation

$$\frac{dm}{dt} = mg(x) - \gamma_m m \quad (4)$$

where  $\gamma_m$  and  $g(x)$  are rates of deletion and expansion of rDNA repeats, respectively. A key feature here is that  $g(x)$  is a monotonically decreasing function of SIR2 levels. The mathematical model given by (3)-(4) has been referred to in literature as *integral feedback control* (Aoki et al, Nature 2019) and it ensures that the the concentration of rDNA repeats is robustly maintained at a set point. To see this, consider equation (4) at steady-state, which gives the equilibrium SIR2 levels as

$$\bar{x} = g^{-1}(\gamma_m) \quad (5)$$

where  $g^{-1}$  denotes the inverse transformation of  $g$ . Now using (3) we can see that the steady-state rDNA repeat concentration  $\bar{m}/V$  should satisfy

$$\frac{c^2}{\frac{\bar{m}}{V} + c} = f^{-1}(\gamma_x g^{-1}(\gamma_m)) \quad (6)$$

implying the setpoint

$$\frac{\bar{m}}{V} = \frac{c^2}{f(\gamma_x g^{-1}(\gamma_m))} - c. \quad (7)$$

In essence, an increase in volume results in an increase in the concentration of free UAF molecule as per (2). This causes the SIR2 production rate, and its levels  $x$  to decrease, which in turn increases the rate of expansion

of rDNA repeats  $g(x)$ . As the number of rDNA repeats increases, it brings down the concentration of free UAF, increases SIR2 levels, and decreases  $g(x)$ . Finally, homeostasis is restored when the number of rDNA increases such that its concentration is back to its set point (7).

For the simulation in Fig. 5, we assume a simple inverse-form for the functions  $f$  and  $g$

$$f(x) = \frac{k_1}{x}, \quad g(x) = \frac{k_2}{x} \quad (8)$$

which leads to the model

$$\frac{dx}{dt} = k_1 \left( \frac{m}{c^2 V} + \frac{1}{c} \right) - \gamma_x x, \quad \frac{dm}{dt} = m \left( \frac{k_2}{x} - \gamma_m \right) \quad (9)$$

with the steady-state solution

$$\bar{x} = \frac{k_2}{\gamma_m}, \quad \bar{m} = V \left( \frac{k_2 \gamma_x c^2}{k_1 \gamma_m} - c \right). \quad (10)$$

We next define two dimensionless variables by normalizing  $x(t)$  and  $m(t)$  by their steady-state values in WT that is assumed to have a volume  $V = 1$  *a.u.*

$$\hat{x} = \frac{x}{\bar{x}}, \quad \hat{m} = \frac{m}{\bar{m}}. \quad (11)$$

Rewriting model (10) in terms of these dimensionless variables yields

$$\frac{d\hat{x}}{dt} = \frac{k_1 \gamma_m}{k_2 c} \left( \frac{\hat{m} \left( \frac{k_2 \gamma_x c}{k_1 \gamma_m} - 1 \right)}{V} + 1 \right) - \gamma_x \hat{x}, \quad \frac{d\hat{m}}{dt} = \gamma_m \hat{m} \left( \frac{1}{\hat{x}} - 1 \right). \quad (12)$$

For the simulation in Fig. 5, we run the above model assuming a two-fold increase in volume to  $V = 2 \text{ a.u.}$ ,

$$\frac{k_1 \gamma_m}{k_2 c} = 1 \quad (13)$$

and  $\gamma_x = 2$  per generation. As expected, SIR2 shows a rapid dip and increases back to the original level as in the WT, while the number of rDNA repeats shows a two-fold increase over generations keeping its concentration the same as in the WT.
